# Supplementary material
Source: MDPI journal article supplement (https://www.mdpi.com/2073-4441/15/3/444)
Supplement: s1 [file s1 › water-2130423-supplementary.pdf]

Supplementary Materials for

# Development of Membrane Fouling-Control Strategy for Ceramic Membrane Bioreactor Applied in Partial Nitrification Process

Bingxin Li <sup>1</sup>, Ruochen Wang <sup>1</sup>, Weiwei Zuo <sup>1</sup>, Yi Peng <sup>2,3</sup>, Dong An <sup>2,3</sup>, Liang Zhang <sup>1</sup>, and Zheng Ge <sup>1,\*</sup>

<sup>1</sup> National Engineering Laboratory for Advanced Municipal Wastewater Treatment and Reuse Technology, Engineering Research Center of Beijing, Beijing University of Technology, Beijing 100124, PR China

<sup>2</sup> Beijing Xintong Bishui Reclaimed Water Co.Ltd., Beijing 101149, China

<sup>3</sup> SDIC Xinkai Water Environment Investment Co.Ltd., Beijing 101101, China

\* Correspondence: gezheng@bjut.edu.cn

**Table S1.** Microbial richness and diversity in ceramic MBR.

|        | ACE    | Chao   | Shannon | Simpson | Coverage (%) |
|--------|--------|--------|---------|---------|--------------|
| Day 1  | 410.15 | 412.53 | 3.56    | 0.08    | 99.94        |
| Day 41 | 417.99 | 415.61 | 4.30    | 0.03    | 99.94        |
| Day 91 | 435.35 | 436.92 | 3.84    | 0.05    | 99.91        |

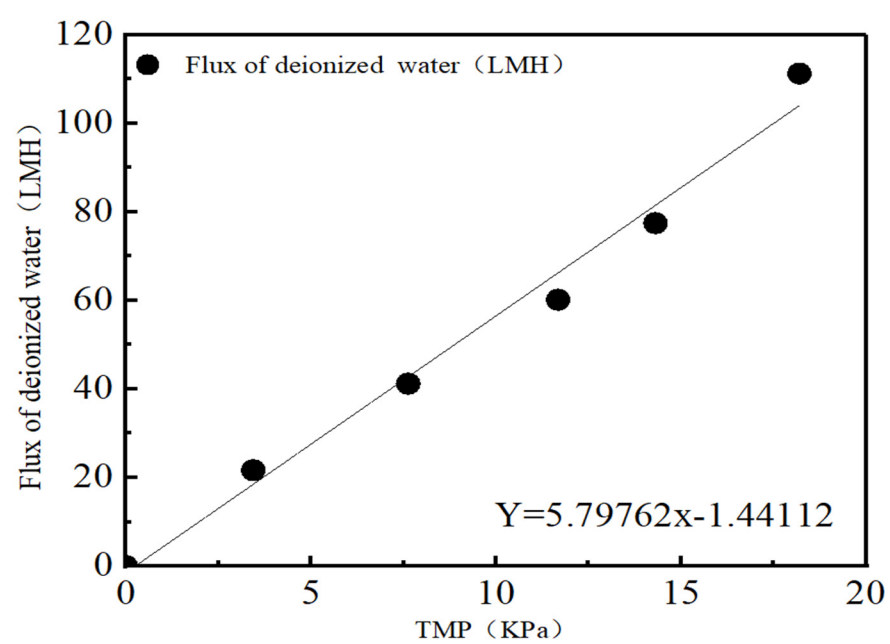

**Figure S1.** Deionization flux of ceramic membrane.

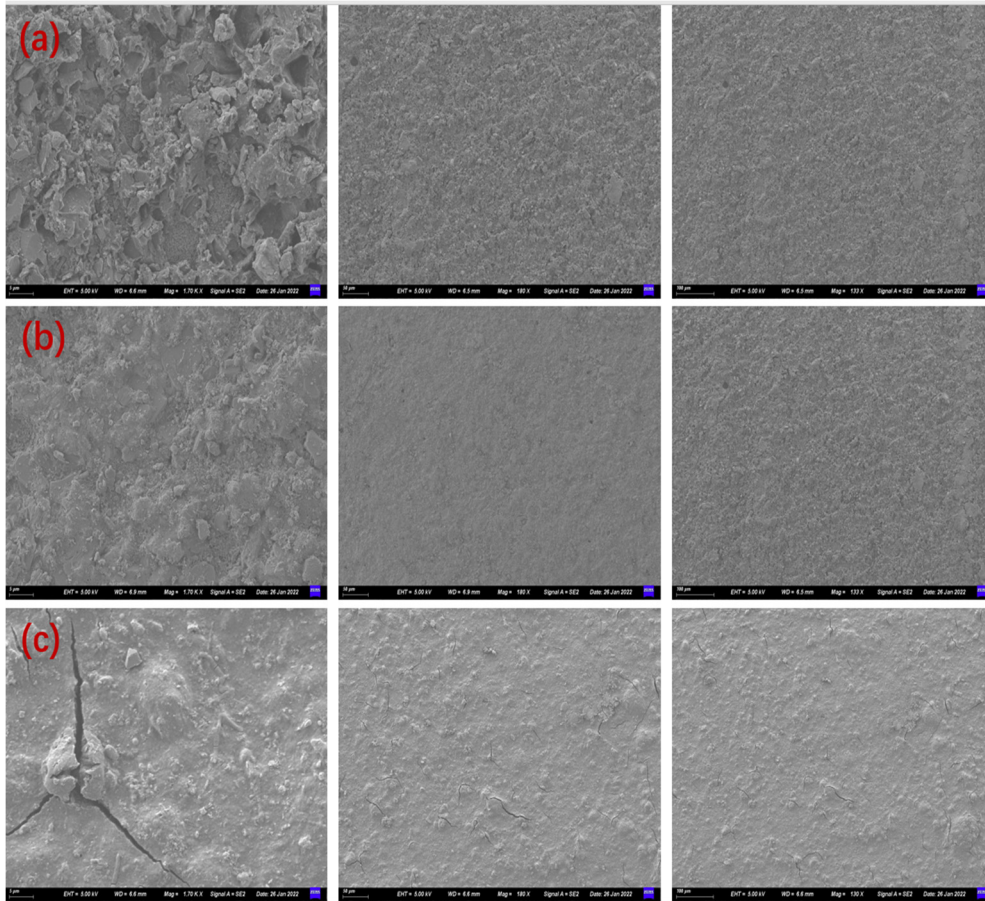

**Figure S2.** SEM images of ceramic membrane surface. **(a)** New membrane; **(b)** with cleaning equipment; **(c)** without cleaning equipment.

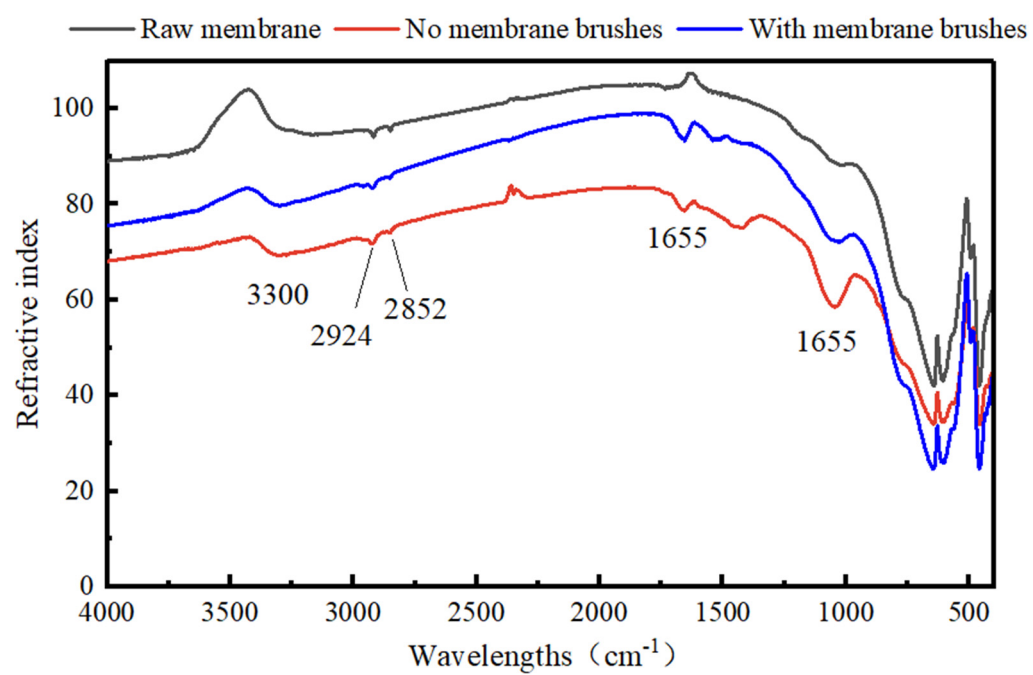

**Figure S3.** FTIR images of ceramic membrane surface.

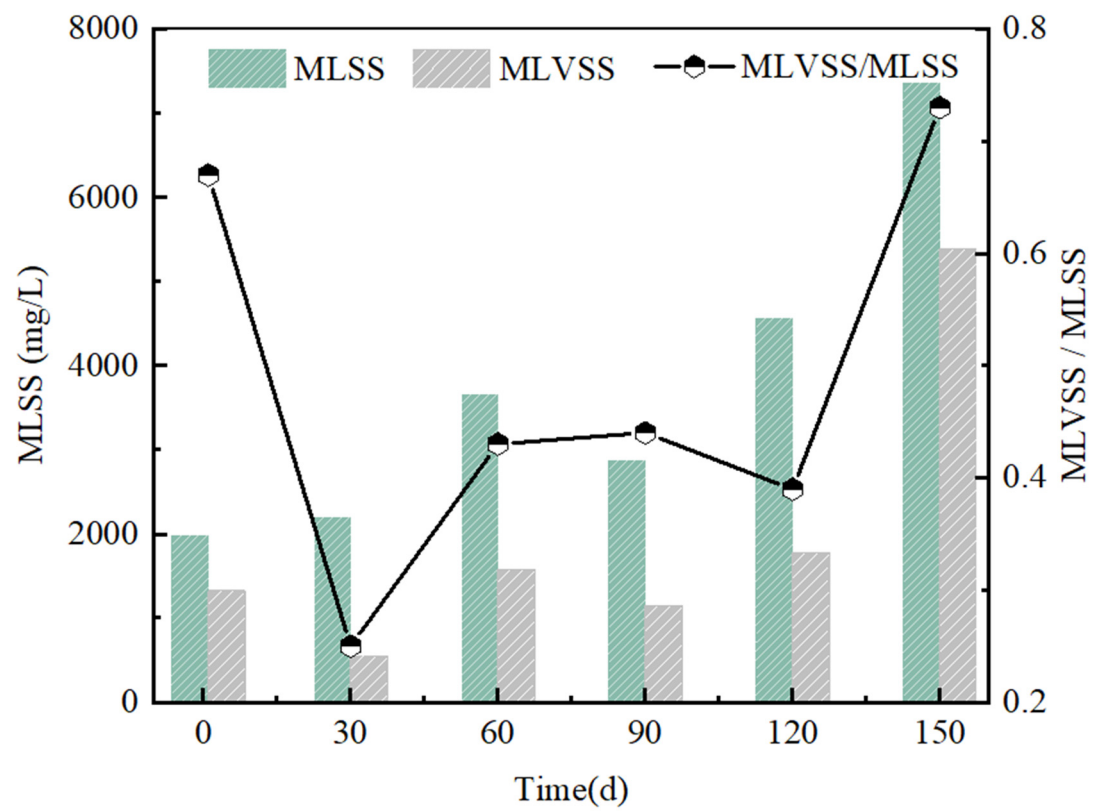

**Figure S4.** Changes in MLSS, MLVSS, and MLSS/MLVSS during operation.

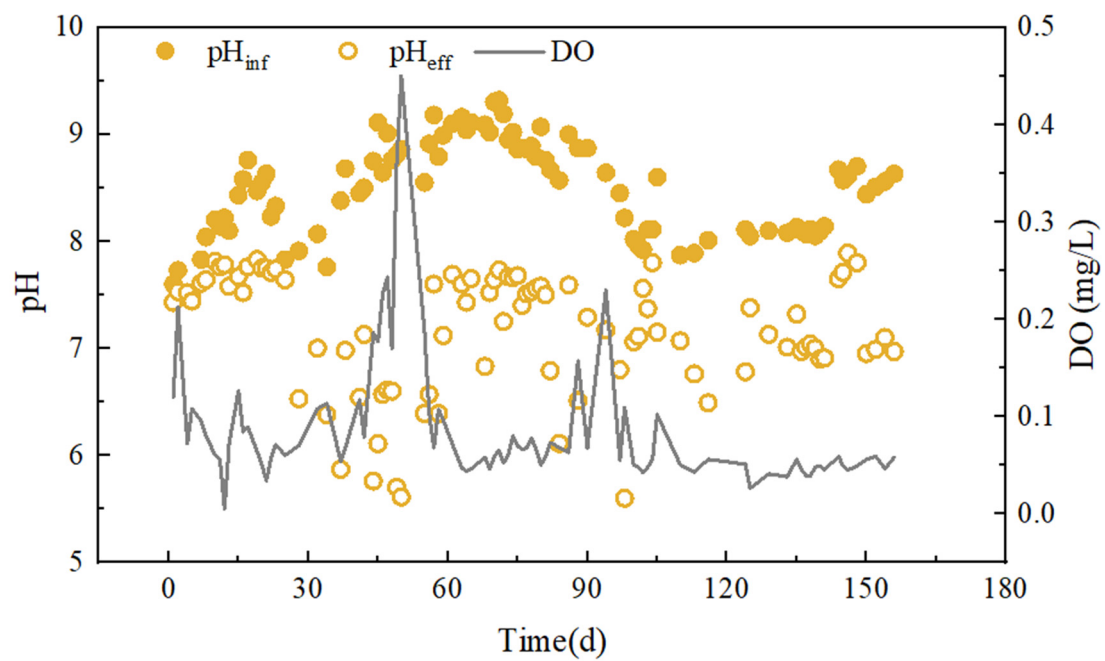

**Figure S5.** pH and DO in the ceramic membrane bioreactor.

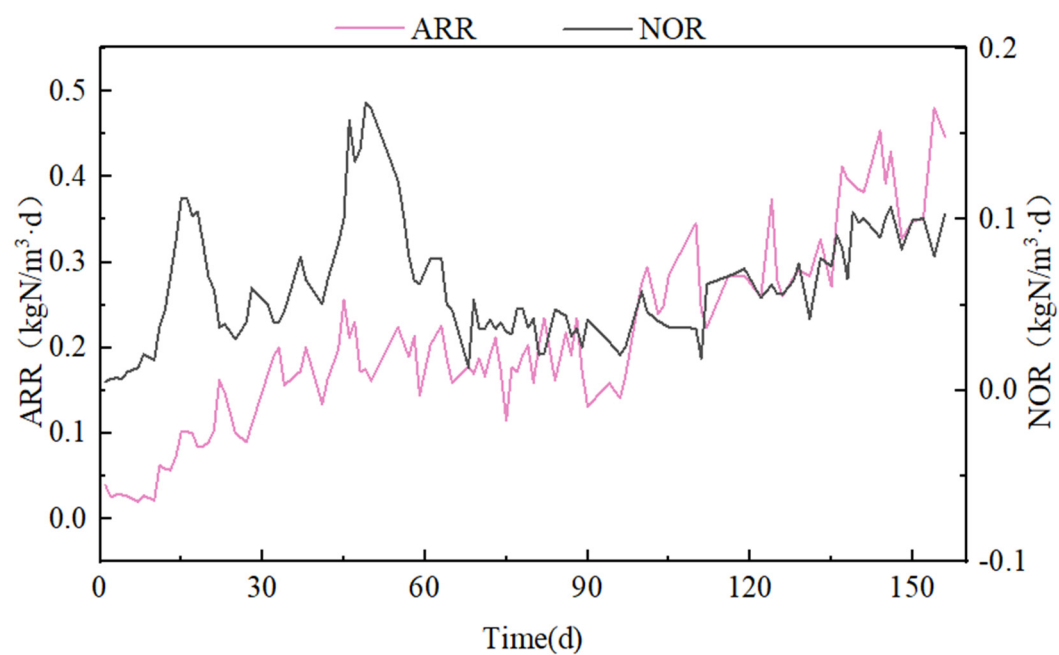

**Figure S6.** Changes in ammonia removal rate (ARR) and nitrite oxidizing rate (NOR) in the ceramic membrane bioreactor.
